# Supplementary material for: Direct ink writing of organic and carbon aerogels
Source: Royal Society of Chemistry journal article supplement (doi:10.1039/c8mh00603b), 2018-01-01
Supplement: c8mh00603b1.pdf [file c8mh00603b1.pdf]

## Direct Ink Writing of Organic and Carbon Aerogels

Swetha Chandrasekaran<sup>1‡</sup>, Bin Yao<sup>2‡</sup>, Tianyu Liu<sup>2</sup>, Wang Xiao<sup>2</sup>, Yu Song<sup>2</sup>, Fang Qian<sup>1</sup>, Cheng Zhu<sup>3</sup>, Eric B. Duoss<sup>3</sup>, Christopher M. Spadaccini<sup>3</sup>, Yat Li<sup>2\*</sup>, Marcus A. Worsley<sup>1\*</sup>

<sup>1</sup> *Physics and Life Science Directorate, Lawrence Livermore National Laboratory, Livermore, California 94550, United States.*

<sup>2</sup> *Department of Chemistry and Biochemistry, University of California, Santa Cruz, California 95064, United States.*

<sup>3</sup> *Engineering Directorate, Lawrence Livermore National Laboratory, Livermore, California 94550, United States.*

‡ *These authors contributed equally to this work.*

\* *Corresponding authors: [yatli@ucsc.edu](mailto:yatli@ucsc.edu), [worsley1@llnl.gov](mailto:worsley1@llnl.gov)*

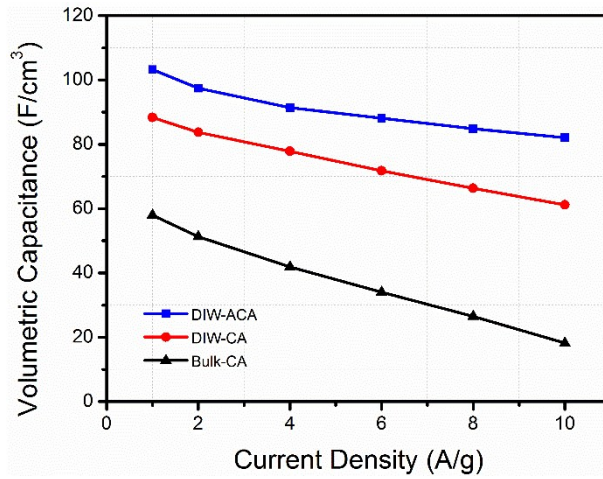

Figure S1 Volumetric capacitance of DIW-CA, DIW-ACA and bulk-CA electrodes.

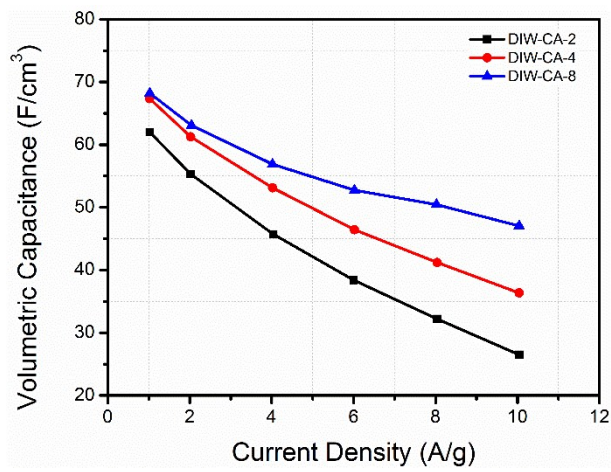

Figure S2 Volumetric capacitance of the DIW-CA-2, DIW-CA-4 and DIW-CA-8 electrodes obtained at different current densities.

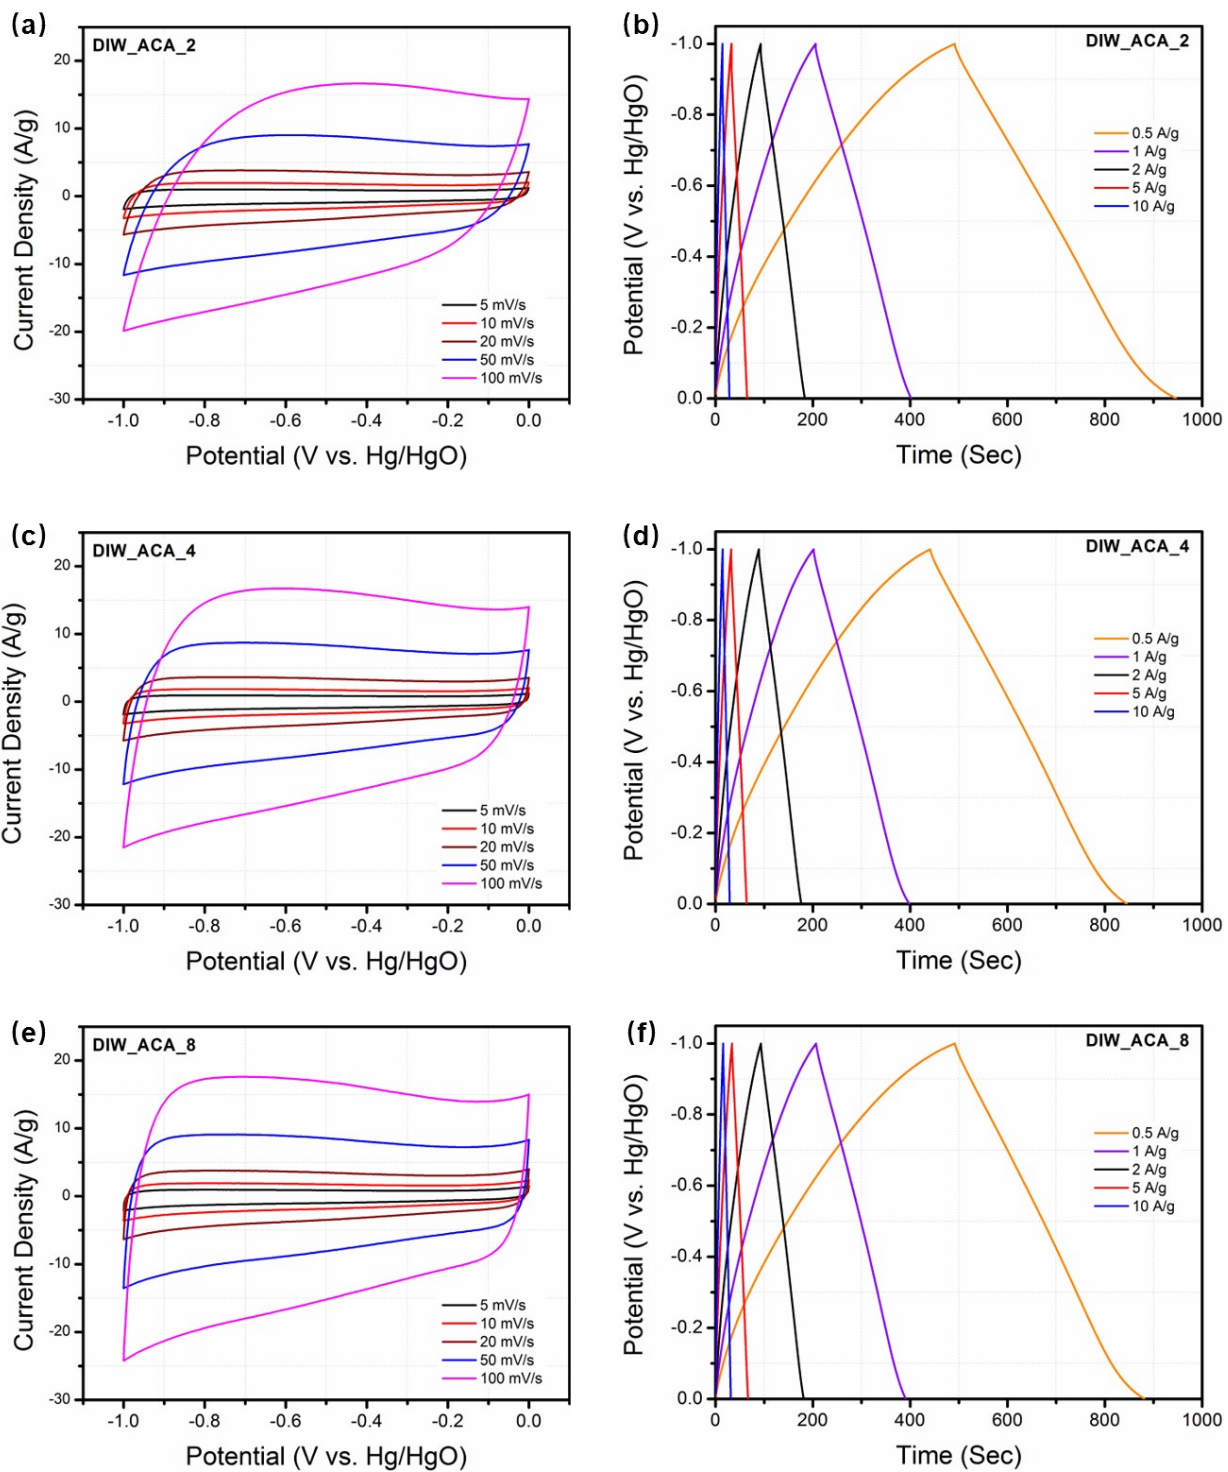

Figure S3 CV and GCD curves of the DIW-ACA-2, DIW-ACA-4 and DIW-ACA-8 electrodes.

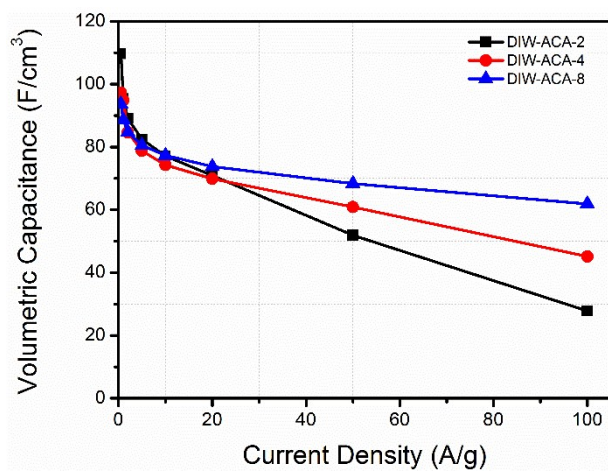

Figure S4 Volumetric capacitance of the DIW-ACA-2, DIW-ACA-4 and DIW-ACA-8 electrodes obtained at different current densities.
